# Supplementary material
Source: PubMed Central journal article supplement (PMC5856236)
Supplement: NIHMS948271-supplement-1.pdf [file NIHMS948271-supplement-1.pdf]

**Supporting Information for:**

**GCIB-ToF-SIMS high resolution imaging of cardiolipin speciation in the brain: Identification of molecular losses after traumatic injury.**

**Hua Tian,<sup>†, \*\*</sup> Louis J. Sparvero,<sup>‡, §, \*\*</sup> Andrew A. Amoscato,<sup>‡, §</sup> Anna Bloom,<sup>†</sup> Hülya Bayır<sup>\*, ‡, §</sup>, Valerian E. Kagan,<sup>‡, §, \*\*\*</sup> and Nicholas Winograd<sup>†</sup>**

<sup>†</sup> Department of Chemistry, Pennsylvania State University, State College, Pennsylvania, USA

<sup>‡</sup> Department of Environmental and Occupational Health, University of Pittsburgh, Pittsburgh, Pennsylvania, USA

<sup>\*\*\*</sup> Departments of Chemistry, Pharmacology and Chemical Biology, Radiation Oncology, University of Pittsburgh, Pittsburgh, Pennsylvania, USA

<sup>§</sup> Center for Free Radical and Antioxidant Health, University of Pittsburgh, Pittsburgh, Pennsylvania, USA

<sup>\*</sup> Department of Critical Care Medicine, and Safar Center for Resuscitation Research, University of Pittsburgh, Pittsburgh, Pennsylvania, USA

<sup>\*\*</sup> These authors contributed equally to this work

Address correspondence to: Dr. Hua Tian, Department of Chemistry, The Pennsylvania State University, 215 Chemistry Building, University Park, PA 16802,  
Email: [hut3@psu.edu](mailto:hut3@psu.edu)

**Table of contents**

Supplemental Fig. S-1 GCIB-SIMS images of CL lipids in a whole naive brain section.

Supplemental Fig. S-2 GCIB-SIMS images of CL lipids in naive hippocampus

Supplemental Fig. S-3 Intensities of CL species in hippocampal layers

Supplemental Fig. S-4 GCIB-SIMS images of CL lipids in a whole CCI brain section.

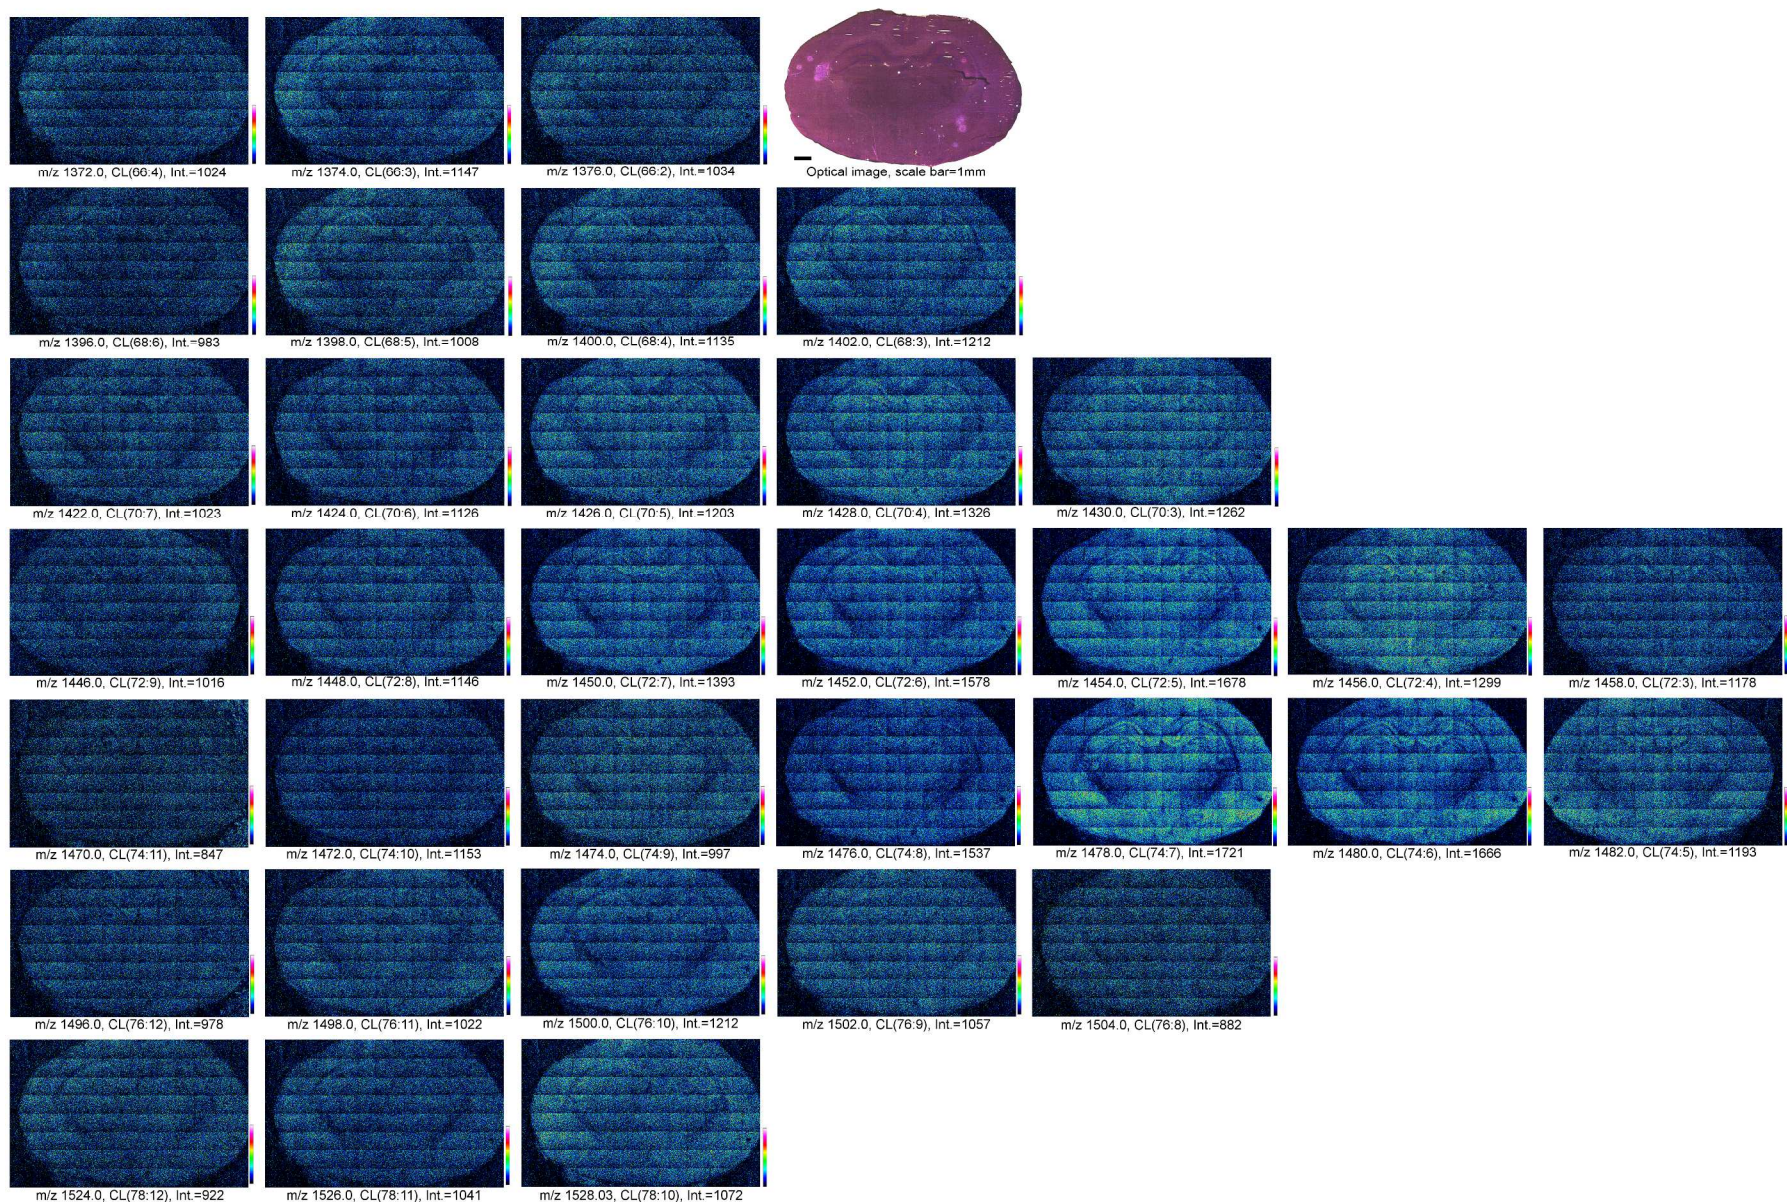

**Supplemental Fig. S-1 GCIB-SIMS images of CL lipids in a whole naive brain section:** SIMS negative ion mode images of CL [M-H]<sup>-</sup> species from an entire naive rat brain coronal section (spatial resolution, 16 microns) treated with EDC/PLC. Individual images for CL species include CL clusters 66:X, 68:X, 70:X, 72:X, 74:X, 76:X and 78:X indicating the total number of fatty acyl carbons (66, 68, etc.) and the total number of double bonds (:X). The optical image of the H&E stained tissue section after GCIB-SIMS (scale bar 1 mm) is shown (top right). SIMS images are displayed as relative intensities with respect to the given ion species, with the absolute intensity of the top of the scale marked. See Table 1 for complete peak assignments.



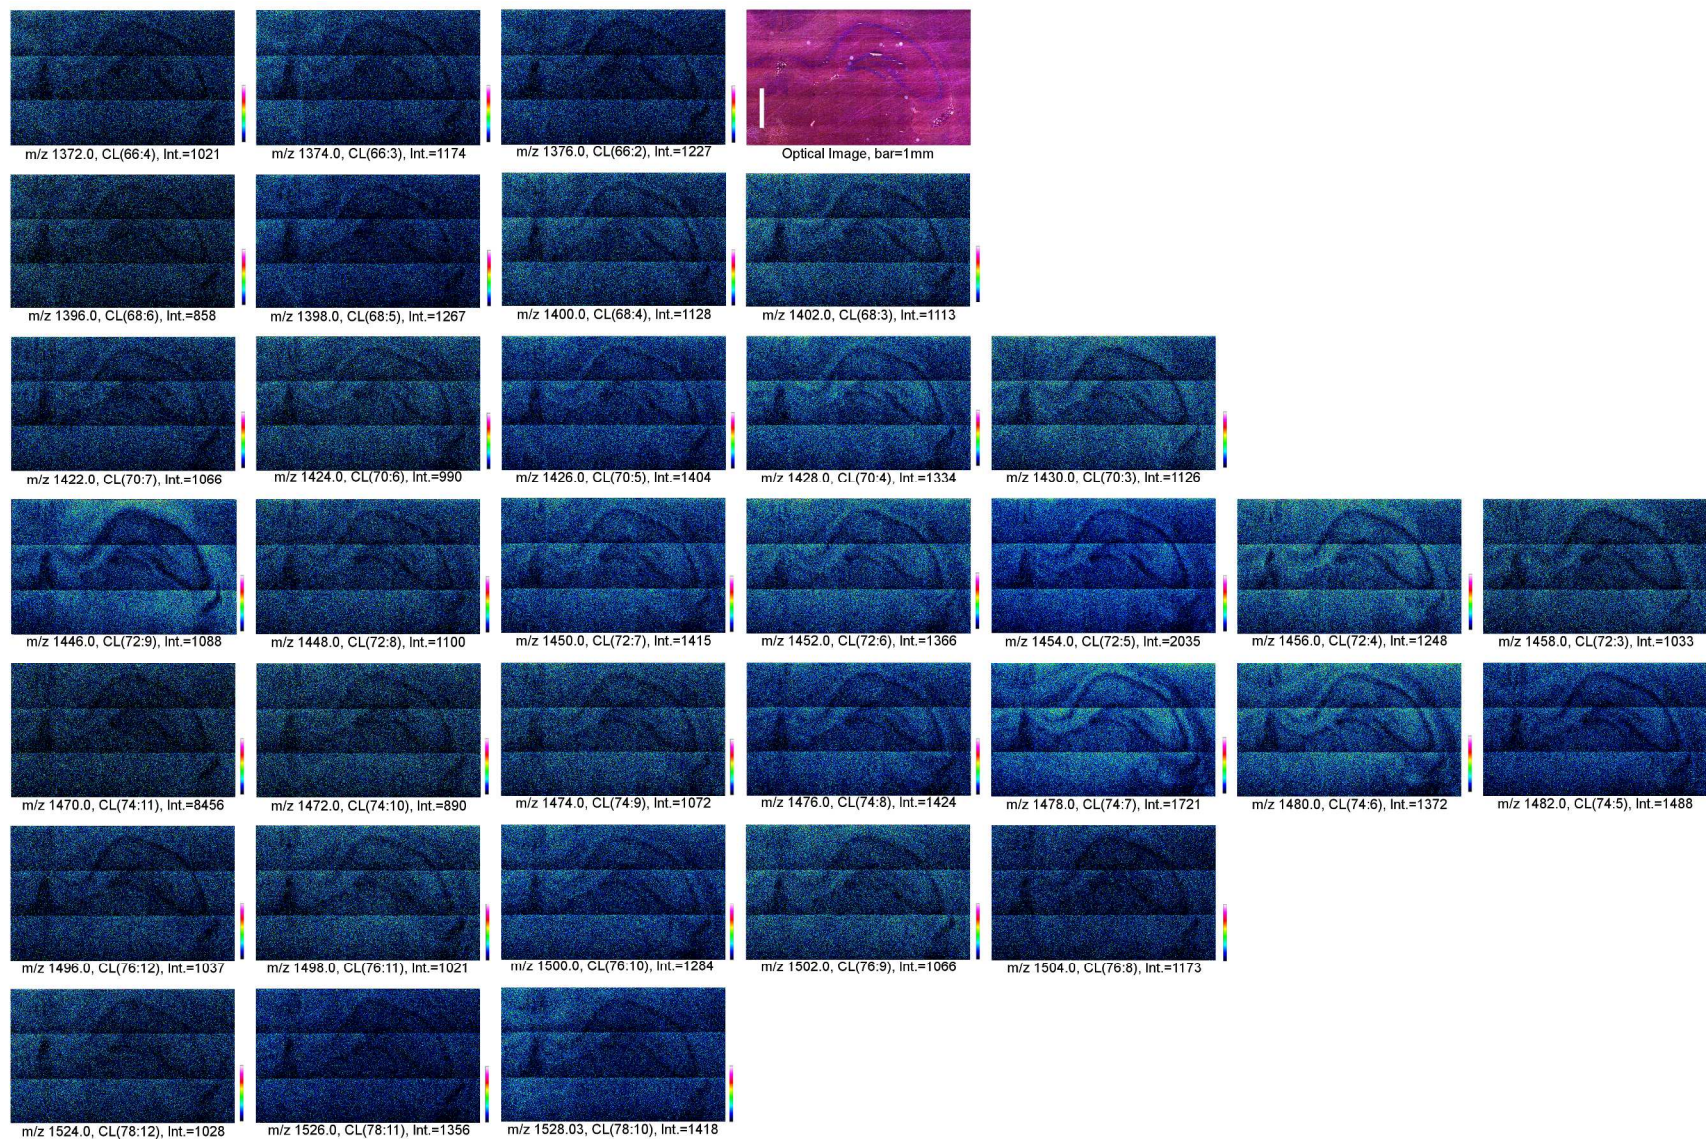

**Supplemental Fig. S-2 GCIB-SIMS images of CL lipids in naive hippocampus:** SIMS negative ion mode images of CL  $[M-H]^-$  species from the hippocampal region of a naive rat brain coronal tissue section (spatial resolution, 8 microns) treated with EDC/PLC. Individual images for CL species include CL clusters 66:X, 68:X, 70:X, 72:X, 74:X, 76:X and 78:X indicating the total number of fatty acyl carbons (66, 68, etc.) and the total number of double bonds (:X). The optical image of the H&E stained tissue section after GCIB-SIMS (scale bar 250  $\mu$ m) is shown (top right). SIMS images are displayed as relative intensities with respect to the given ion species, with the absolute intensity of the top of the scale marked. See Table 1 for complete peak assignments.



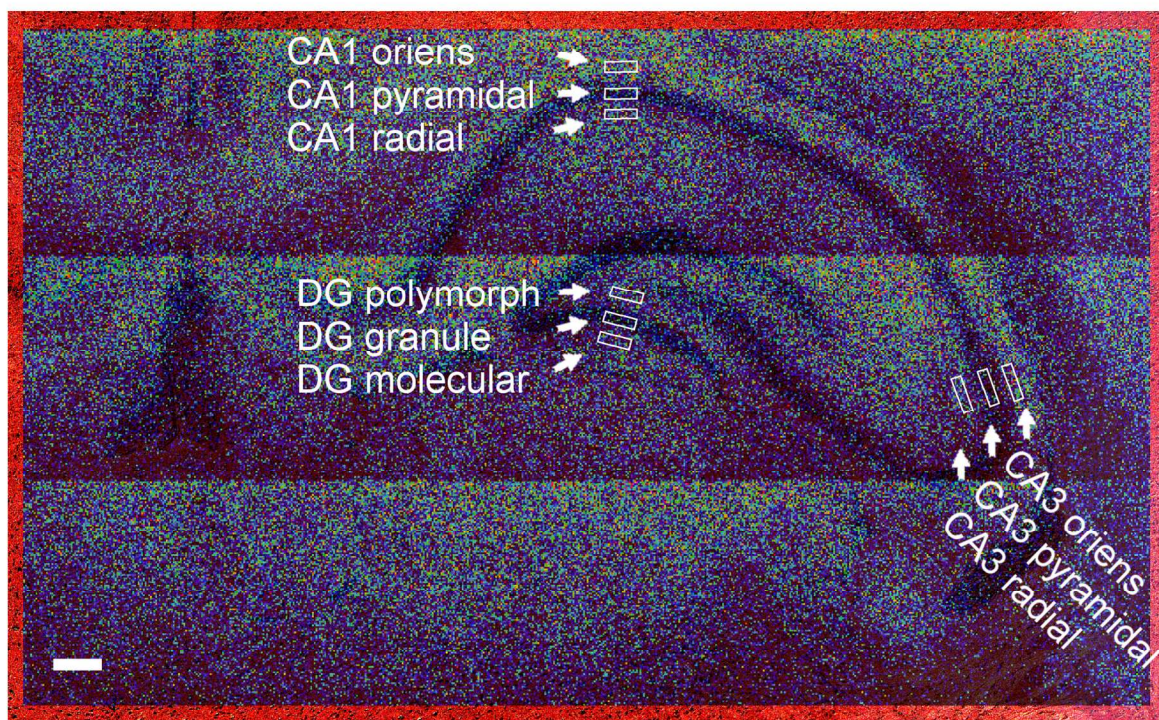

| Species / Location | d(66:4) | d(66:3) | d(66:2) | d(66:1) | d(66:5) | d(66:4) | d(66:3) | d(70:7) | d(70:6) | d(70:5) | d(70:4) | d(70:3) | d(72:9) | d(72:8) | d(72:7) | d(72:6) | d(72:5) | d(72:4) | d(72:3) | c(74:11) | c(74:10) | d(74:9) | d(74:8) | d(74:7) | d(74:6) | d(74:5) | c(76:12) | c(76:11) | c(76:10) | d(76:9) | d(76:8) | c(78:12) | c(78:11) | c(78:10) |
|--------------------|---------|---------|---------|---------|---------|---------|---------|---------|---------|---------|---------|---------|---------|---------|---------|---------|---------|---------|---------|----------|----------|---------|---------|---------|---------|---------|----------|----------|----------|---------|---------|----------|----------|----------|
| DG Mo              | 5912    | 9355    | 6343    | 4797    | 7875    | 8088    | 10236   | 7318    | 8226    | 13317   | 18936   | 15850   | 5447    | 10515   | 17890   | 18146   | 30086   | 21473   | 11620   | 7029     | 8475     | 9284    | 14061   | 26664   | 25355   | 12505   | 8147     | 12717    | 12045    | 12173   | 7744    | 8209     | 7459     | 9412     |
| DG Gr              | 6088    | 6633    | 4002    | 6002    | 3301    | 7542    | 6782    | 4865    | 7328    | 8741    | 12746   | 11522   | 4348    | 6396    | 10031   | 14016   | 14165   | 13342   | 7260    | 3901     | 3437     | 5218    | 9955    | 15255   | 14590   | 4655    | 4600     | 3911     | 8168     | 7999    | 3206    | 2307     | 7194     | 8516     |
| DG Po              | 10112   | 10247   | 10178   | 7138    | 9390    | 17959   | 16918   | 10349   | 12349   | 22140   | 28103   | 23489   | 6722    | 11014   | 24311   | 24816   | 37067   | 29619   | 13269   | 9275     | 10410    | 15273   | 15961   | 36195   | 26810   | 18305   | 8514     | 11980    | 15623    | 11192   | 9404    | 8065     | 11153    | 11804    |
| CA1 Or             | 12009   | 17697   | 18722   | 12553   | 19533   | 24509   | 24389   | 16771   | 18948   | 24449   | 34905   | 35357   | 12551   | 22324   | 31701   | 36064   | 40489   | 41369   | 26328   | 16232    | 19735    | 22424   | 29058   | 61174   | 37701   | 33253   | 13774    | 20381    | 22864    | 23540   | 16888   | 15978    | 18998    | 24608    |
| CA1 Py             | 7170    | 9387    | 7551    | 5587    | 9718    | 11135   | 10410   | 8267    | 10093   | 14616   | 18571   | 13432   | 5499    | 9896    | 16525   | 17726   | 21583   | 18740   | 8246    | 5091     | 8445     | 12756   | 9013    | 20904   | 20896   | 12756   | 7032     | 9371     | 14113    | 9044    | 6402    | 7423     | 8754     | 14846    |
| CA1 Rad            | 8139    | 14436   | 10357   | 9066    | 12227   | 17969   | 15955   | 11121   | 17257   | 16414   | 22303   | 16687   | 6698    | 14435   | 23360   | 24810   | 27379   | 26816   | 12482   | 7642     | 12854    | 12016   | 18230   | 42887   | 25619   | 19921   | 10565    | 14607    | 18442    | 16143   | 7440    | 11492    | 9154     | 17093    |
| CA3 Or             | 9058    | 13998   | 12579   | 7982    | 10088   | 16674   | 17325   | 11025   | 13201   | 25114   | 23098   | 21395   | 9895    | 14941   | 25812   | 26202   | 33932   | 29789   | 15629   | 8490     | 7379     | 16050   | 20355   | 42374   | 29734   | 22695   | 13379    | 15103    | 19771    | 16400   | 11771   | 10477    | 14595    | 16146    |
| CA3 Py             | 3006    | 2606    | 6044    | 3480    | 2858    | 5480    | 6232    | 4053    | 5182    | 8986    | 9705    | 7365    | 3298    | 3748    | 8806    | 10617   | 10827   | 8808    | 6449    | 2710     | 3838     | 4649    | 10933   | 11564   | 11692   | 5329    | 3183     | 5315     | 8103     | 6527    | 3343    | 5509     | 5494     | 6066     |
| CA3 Rad            | 9103    | 10685   | 8864    | 7110    | 9342    | 11552   | 12707   | 9176    | 7997    | 12930   | 20349   | 16409   | 5520    | 9337    | 17372   | 16372   | 25899   | 15861   | 12704   | 3724     | 4974     | 11613   | 15288   | 28939   | 23017   | 13674   | 5107     | 9833     | 18447    | 14840   | 9402    | 7946     | 10519    | 11931    |

**Supplemental Fig. S-3 Intensities of CL species in hippocampal layers:** Top: SIMS negative ion mode image of  $m/z$  1478.0, CL(74:7) [M-H] species from the hippocampal region of a naïve rat brain coronal tissue section (spatial resolution, 8 microns) treated with EDC/PLC. The SIMS image is overlaid onto the optical image of the H&E stained tissue section after GCIB-SIMS (scale bar 250  $\mu$ m). Three regions within the hippocampus with three layers each are marked with white rectangles. Bottom: Intensities of all the CL species according to location. 120 pixels from each location were used to determine the intensity values. CA1: Cornu Ammonis 1, CA3: Cornu Ammonis 3, DG: Dentate Gyrus, Mo: Molecular layer, Po: Polymorphic layer, Gr: Granular layer, Or: Oriens layer, Py: Pyramidal tract, Rad: Radial layer.



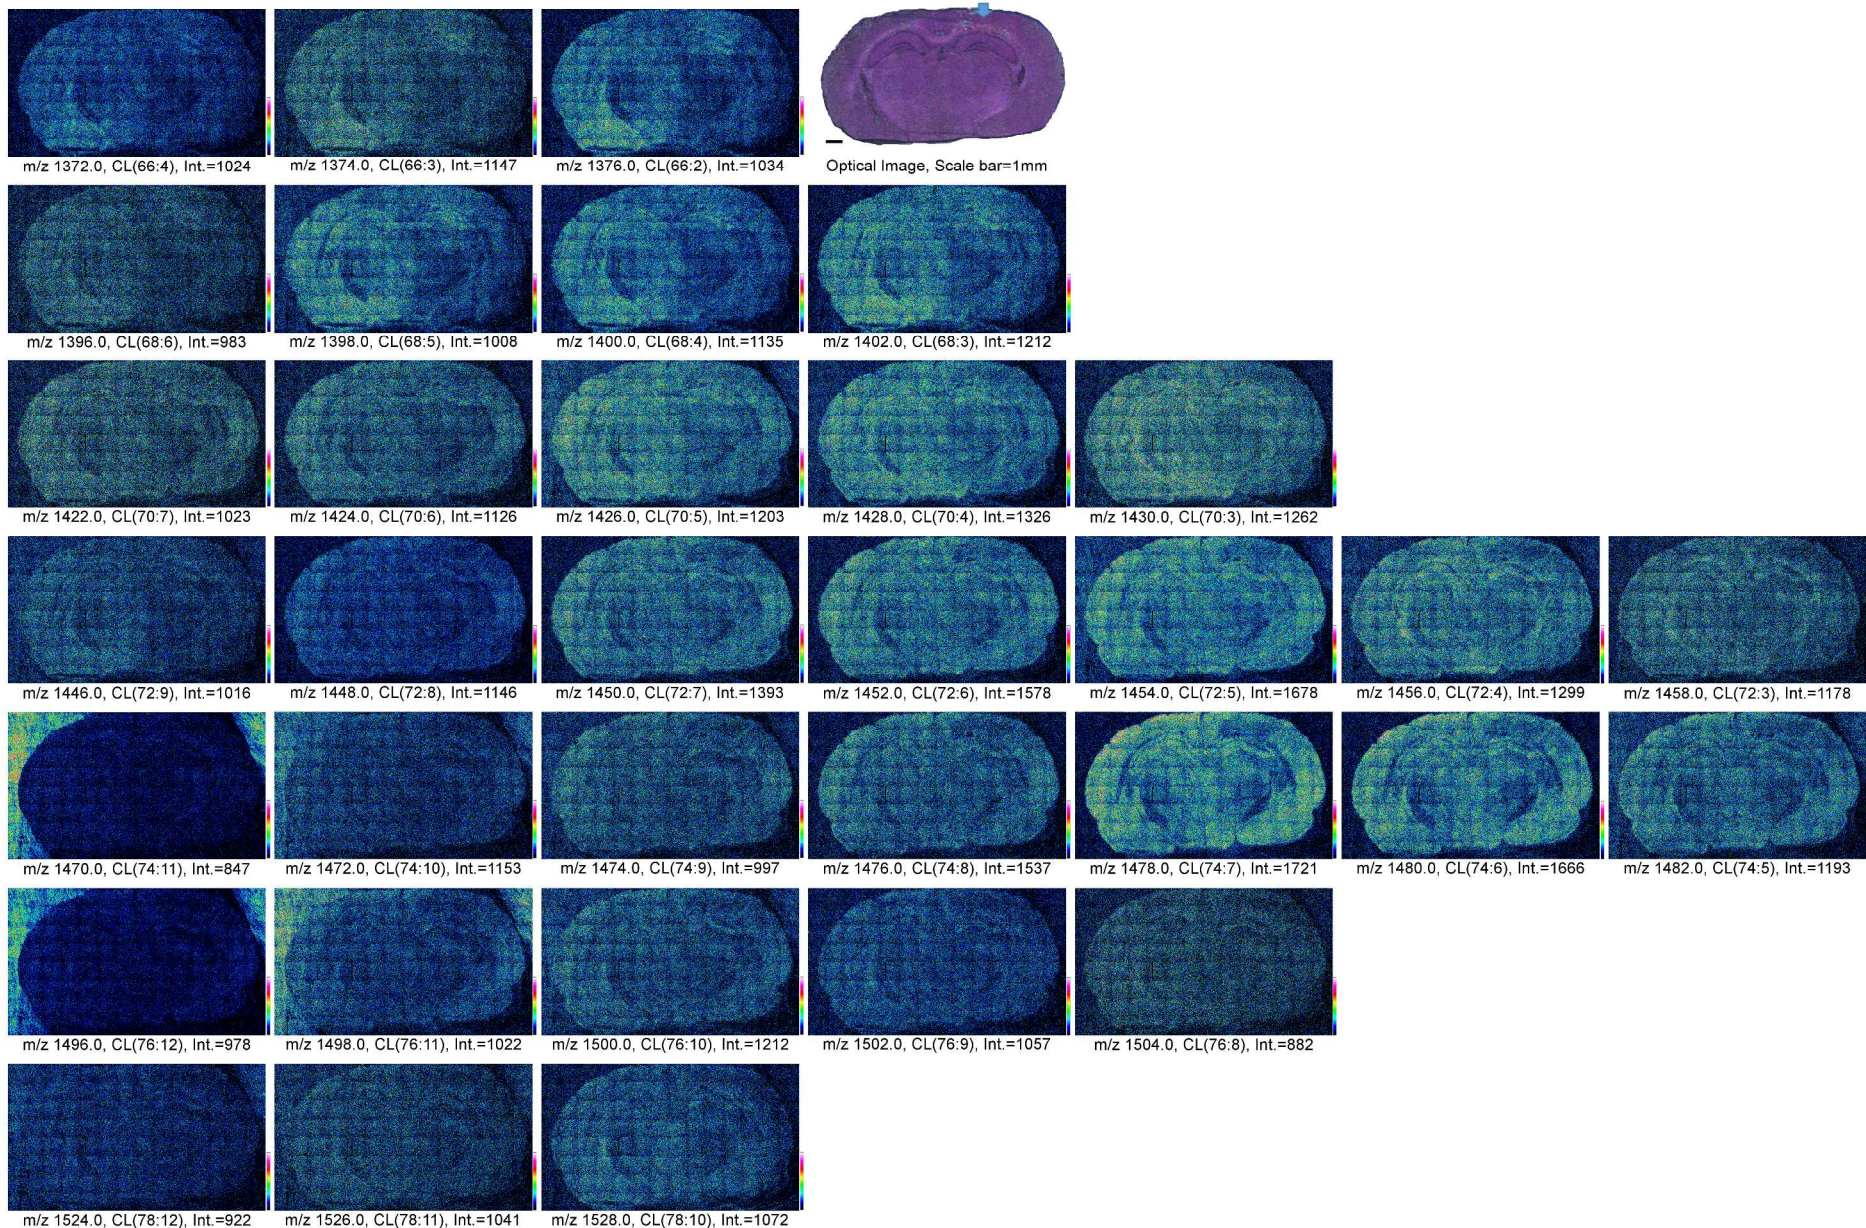

**Supplemental Fig. S-4 GCIB-SIMS images of CL lipids in a whole CCI brain section:** SIMS negative ion mode images of CL [M-H]<sup>-</sup> species from an entire CCI rat brain coronal section (spatial resolution, 16 microns) treated with EDC/PLC. Individual images for CL species include CL clusters 66:X, 68:X, 70:X, 72:X, 74:X, 76:X and 78:X indicating the total number of fatty acyl carbons (66, 68, etc.) and the total number of double bonds (:X). Optical image of H&E stain from the actual tissue section (scale bar = 1 mm) is shown, and the blue arrow indicates the point of impact on the ipsilateral hemisphere. SIMS images are displayed as relative intensities with respect to the given ion species, with the absolute intensity of the top of the scale marked. See Table 1 for complete peak assignments.
